# Supplementary material for: TOP2A expression in pheochromocytoma and abdominal paraganglioma: a novel marker of poor clinical outcome?
Source: Research Square preprint supplement (doi:10.21203/rs.3.rs-2214588/v1), 2022-11-02
Supplement: Supplementary file 1 [file 4d87d44d3944a8a6b576e934.xlsx]

## Sheet: Blad1
Table 2. Clinical and genetic parameters and statistical comparisons to TOP2A mRNA levels in 159 PPGL from the TCGA dataset
Parameter	p-value, Observations
Type of tumor	p = 0.573
PCC / aPGL	n = 134 / n = 25
Sex	p = 0.621
Male / Female	n = 72 / n = 87
Age at diagnosis	p < 0.001, R = -0.356
median (min - max) years	46 (19-83)
Progressive disease	p = 0.043
Progression	n = 18
No progression	n = 141
Progression of diseaae	p = 0.386
Absolute outcome	p = 0.082
Alive	n = 154
Dead	n = 5
Disease-related outcome	p = 0.078
Alive or DOC	n = 156
DOD	n = 3
TOP2A mutation
Mutation	n = 0
Wild-type	n = 159
TOP2A copy numbers
Gain	n = 5
No alteration	n = 119
Loss	n = 33
Significant p-values (<0.05) are highlighted in bold.
