# Supplementary material for: TOP2A expression in pheochromocytoma and abdominal paraganglioma: a novel marker of poor clinical outcome?
Source: Research Square preprint supplement (doi:10.21203/rs.3.rs-2214588/v1), 2022-11-02
Supplement: Supplementary file 2 [file d969a5a7ee090815586cecd9.xlsx]

## Sheet: Blad1
Table 3. Comparison between PASS parameters and high or low TOP2A mRNA expression levels in PPGL
PASS variable	< mean	> mean
(informative cases, n = 70)	TOP2A (n = )	TOP2A (n = )	p-value
Large nests or diffuse growth			p = 0.709
Positive	20	2
Negative	41	7
Focal or confluent necrosis			p = 0.055
Positive	9	4
Negative	52	5
High cellularity			p = 1.000
Positive	11	1
Negative	50	8
Cellular monotony			p = 0.219
Positive	5	2
Negative	56	7
Tumor cell spindling			p = 0.013
Positive	2	3
Negative	59	6
Mitotic figures ≥3/10HPF			p = 0.042
Positive	1	2
Negative	60	7
Periadrenal adipose tissue invasion			p = 0.112
Positive	7	3
Negative	54	6
Vascular invasion			p = 0.625
Positive	9	2
Negative	52	7
Capsular invasion			p = 0.001
Positive	11	7
Negative	50	2
Profound nuclear pleomorphism			p = 1.000
Positive	25	4
Negative	36	5
Hyper-chromasia			p = 0.625
Positive	9	2
Negative	52	7
Each PASS parameter was compared to TOP2A mRNA expression (above and below the mean value) using Fisher’s exact test.
Significant p-values (< 0.05) are highlighted in bold.
