# Supplementary material for: TOP2A expression in pheochromocytoma and abdominal paraganglioma: a novel marker of poor clinical outcome?
Source: Research Square preprint supplement (doi:10.21203/rs.3.rs-2214588/v1), 2022-11-02
Supplement: Supplementary file 3 [file e53d05e072d3f30d9de96671.xlsx]

## Sheet: Table 1
Table 1. Clinical and genetic parameters and statistical comparisons to TOP2A mRNA levels in PPGL, aPGL and PCC separately.
	TOP2A in PPGL	TOP2A in aPGL	TOP2A in PCC
Parameter	p-value, Observations	p-value, Observations	p-value, Observations
Type of tumor	p = 0.005
PCC /aPGL	n = 73 /n = 10
Sex	p = 0.019	p = 0.192	p = 0.148
Male / Female	n = 40/n = 43	n = 8 /n = 2	n = 32/n = 41
Age at diagnosis	p = 0.008, R = -0.287	p = 0.467, R = -0.261	p = 0.114, R = -0.187
median (min - max) years	54.3 (14-83)	34.5 (14-73)	56 (19-83)
Tumor size	p = 0.644; R = 0.051	p = 0.144; R = -0.497	p = 0.457; R = -0.088
median (min - max) mm	45 (15-160)	45 (30-70)	45 (15-160)
Total PASS score	p = 0.126; R = 0.193	p = 0.498; R = -0.261	p = 0.426; R = 0.109
median (min - max)	3 (0-10)	5 (1-9)	2 (0-10)
Noradrenaline (NA) levels	p = 0.005	p = 0.275	p = 0.012
Increased NA /Normal NA	n = 43/n = 12	n = 7 /n = 1	n = 36/n = 11
Adrenalin levels	p = 0.175	p = 0.456	p = 0.051
Increased adrenalin / Normal	n = 24/n = 32	n = 3/n = 5	n = 21/n = 27
Cluster 1 or 2 genotype	p = 0.006	p = 0.079	p = 0.197
Cluster 1 / Cluster 2	n = 22/n = 49	n = 7 /n = 2	n = 15/n = 47
Metastasis or Local Recurrence	p = 0.009	p = 0.055	p = 0.332
Metastasis	n = 8	n = 4	n = 4
No metastasis	n = 75	n = 6	n = 69
Absolute outcome	p = 0.915	p = 0.201	p = 0.357
Dead	n = 20	n = 4	n = 16
Alive	n = 63	n = 6	n = 57
Absolute outcome	p = 0.184
Disease-related outcome	p = 0.096	p = 0.296	p = 0.457
DOD	n = 4	n = 2	n = 2
Alive or DOC	n = 79	n = 8	n = 71
Disease-related outcome	p = 0.050
Significant p-values (<0.05) are highlighted in bold.
